# Supplementary material
Source: Springer Nature journal article supplement (https://www.springermedizin.de/resource/supplementary/12943_2010_885_MOESM1_ESM.pdf/9551914)

**EBV IgA ELISA seroreactivity**

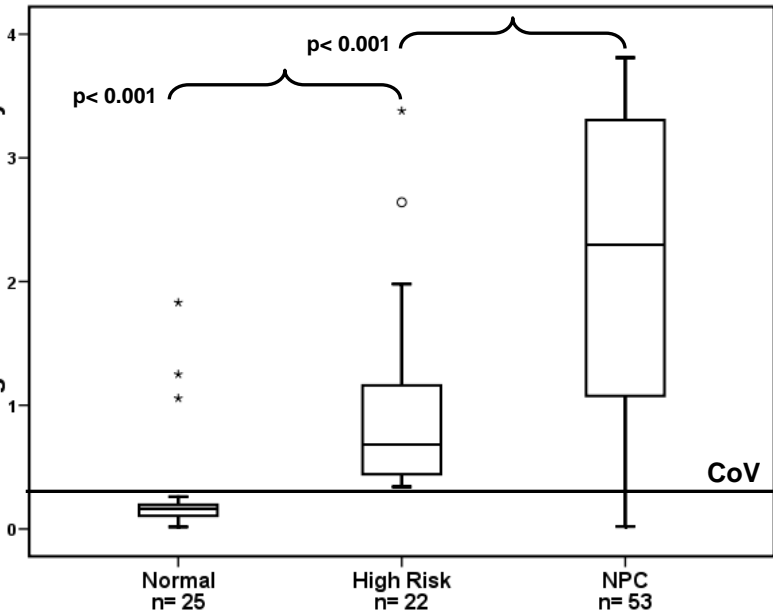

Supplement: MOESM1 [file 9551914]
